# Supplementary material for: Technical note: Sampling and processing of mesocosm sediment trap material for quantitative biogeochemical analysis
Source: Copernicus journal article supplement (doi:10.5194/bg-13-2849-2016), 2016-05-13
Supplement: Supplementary file 1 [file bg-13-2849-2016-supplement.zip]

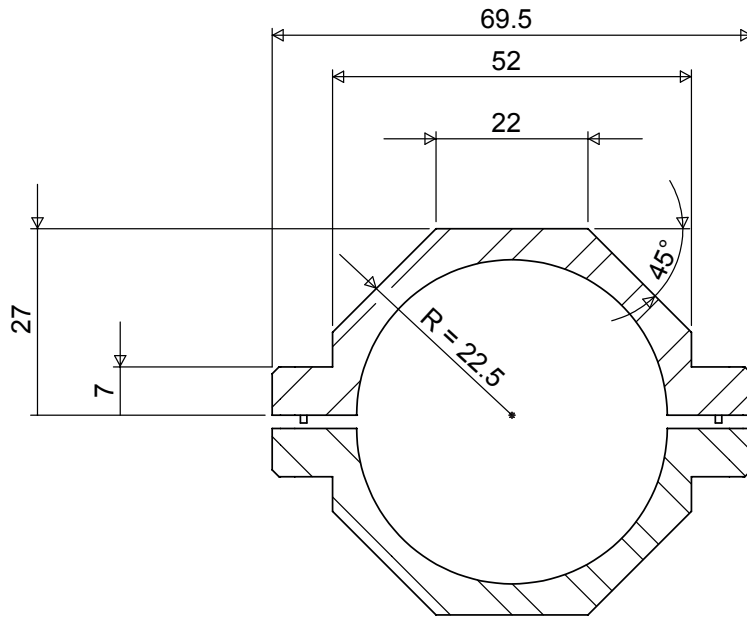

**Figure S1.** Technical drawing (lateral view) of a dividable hollow sphere cut out of stainless steel (V4A/1.4571) for grinding of concentrated and freeze-dried sediment trap samples. The sphere consists of two hollow hemispheres, which are only connected by two guide pins and sealed by a metal sealing. All physical dimensions are given in millimeters. In this case, the inner radius was 22.5 mm corresponding to a volume of about 47.7 mL.
