# Supplementary material for: Technical note: Sampling and processing of mesocosm sediment trap material for quantitative biogeochemical analysis
Source: Copernicus journal article supplement (doi:10.5194/bg-13-2849-2016), 2016-05-13
Supplement: Supplementary file 2 [file bg-13-2849-2016-supplement.zip]

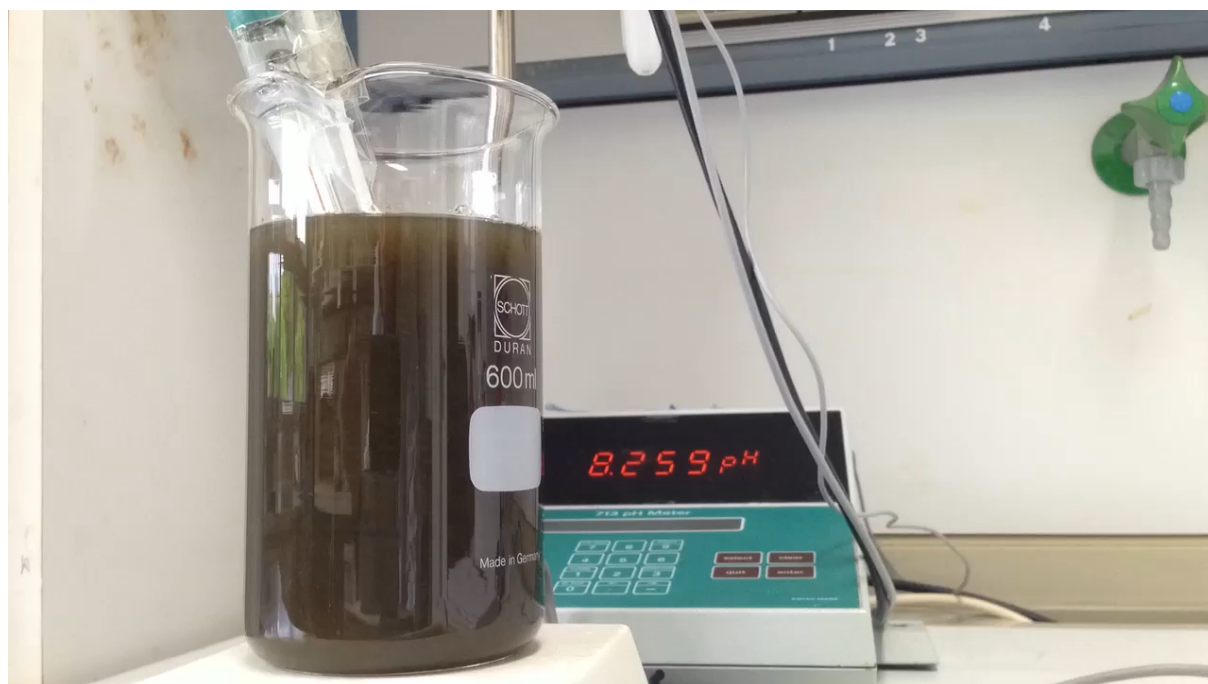

1

2 **Video S1.** Time laps video (about 5 minutes real time) of the precipitation of particles  
3 collected in a KOSMOS sediment trap with 150  $\mu\text{L}$   $\text{FeCl}_3$  (2.4 M) added to 500 mL of  
4 particle suspension. After switching off the magnetic stirrer, the large and dense flocks  
5 rapidly sink down to the bottom of the glass beaker. The sample's pH was stabilized with  
6 330  $\mu\text{L}$   $\text{NaOH}$  (3 M) simultaneously added to the particle suspension.
