# Supplementary material for: Technical note: Sampling and processing of mesocosm sediment trap material for quantitative biogeochemical analysis
Source: Copernicus journal article supplement (doi:10.5194/bg-13-2849-2016), 2016-05-13
Supplement: Supplementary file 3 [file bg-13-2849-2016-supplement.zip]

Archive with 4 entries (4 files):
- SUPPLEMENT_VIDEO1_Boxhammer_etal.MP4
- SUPPLEMENT_VIDEO1_Boxhammer_etal.pdf
- SUPPLEMENT_FIGS1_Boxhammer_etal.pdf
- bg-13-2849-2016-supplement-title-page.pdf
