# Supplementary material for: Technical note: Sampling and processing of mesocosm sediment trap material for quantitative biogeochemical analysis
Source: Copernicus journal article supplement (doi:10.5194/bg-13-2849-2016), 2016-05-13
Supplement: Supplementary file 3 [file bg-13-2849-2016-supplement.zip › bg-13-2849-2016-supplement-title-page.pdf]

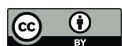

## *Supplement of*

# **Technical note: Sampling and processing of mesocosm sediment trap material for quantitative biogeochemical analysis**

**Tim Boxhammer et al.**

*Correspondence to:* Tim Boxhammer (tboxhammer@geomar.de)

- bg-13-2849-2016-supplement-title-page.pdf
- SUPPLEMENT\_FIGS1\_Boxhammer\_etal.pdf
- SUPPLEMENT\_VIDEO1\_Boxhammer\_etal.MP4
- SUPPLEMENT\_VIDEO1\_Boxhammer\_etal.pdf

The copyright of individual parts of the supplement might differ from the CC-BY 3.0 licence.
